# Supplementary material for: Selective Outdoor Humidity Monitoring Using Epoxybutane Polyethyleneimine in a Flexible Microwave Sensor
Source: MDPI journal article supplement (doi:10.3390/chemosensors11010016), 2022-12-23
Supplement: s1 [file s1]

Archive with 1 entries (1 files):
- chemosensors-2072070-supplementary.pdf
